# Supplementary material for: Spatiotemporally consistent global dataset of the GIMMS leaf area index (GIMMS LAI4g) from 1982 to 2020
Source: Copernicus journal article supplement (doi:10.5194/essd-15-4877-2023), 2023-11-01
Supplement: Supplementary file 1 [file essd-15-4877-2023-supplement.pdf]

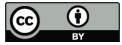

*Supplement of*

## **Spatiotemporally consistent global dataset of the GIMMS leaf area index (GIMMS LAI4g) from 1982 to 2020**

**Sen Cao et al.**

*Correspondence to:* Zaichun Zhu ([zhu.zaichun@pku.edu.cn](mailto:zhu.zaichun@pku.edu.cn))

The copyright of individual parts of the supplement might differ from the article licence.

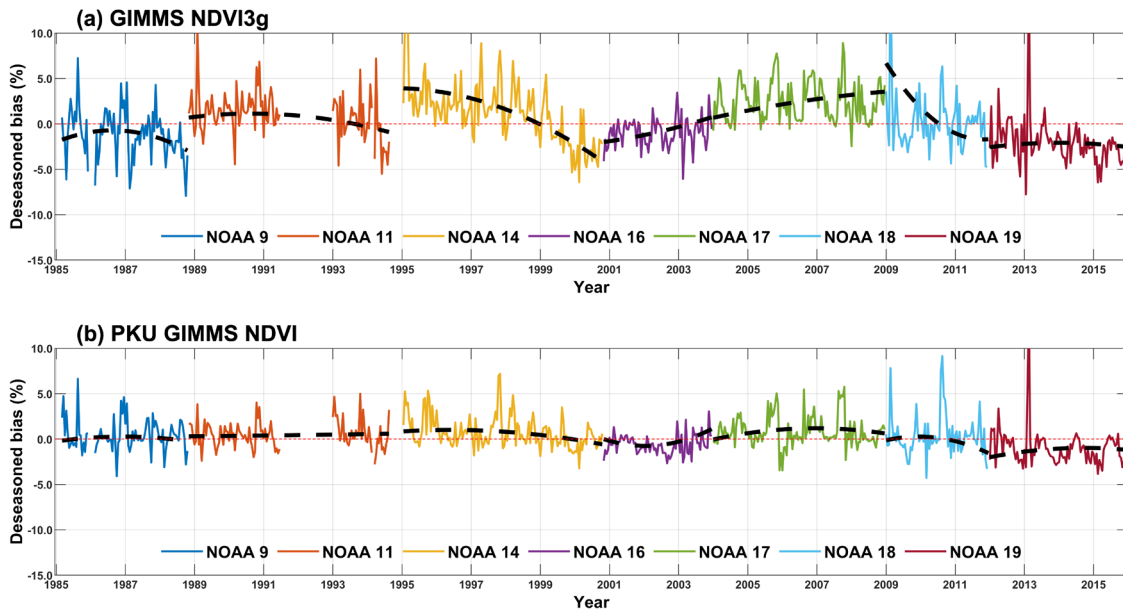

**Figure S1.** Temporal variations of NDVI bias% in EBF for (a) the GIMMS NDVI3g product and (b) the PKU GIMMS NDVI product. The black dash line represents the interannual trend extracted by the EEMD method. Values from different NOAA satellite missions are distinguished with colors. The figure illustrates that the effects of NOAA satellite orbital drift and AVHRR sensor degradation were efficiently removed in the PKU GIMMS NDVI product.

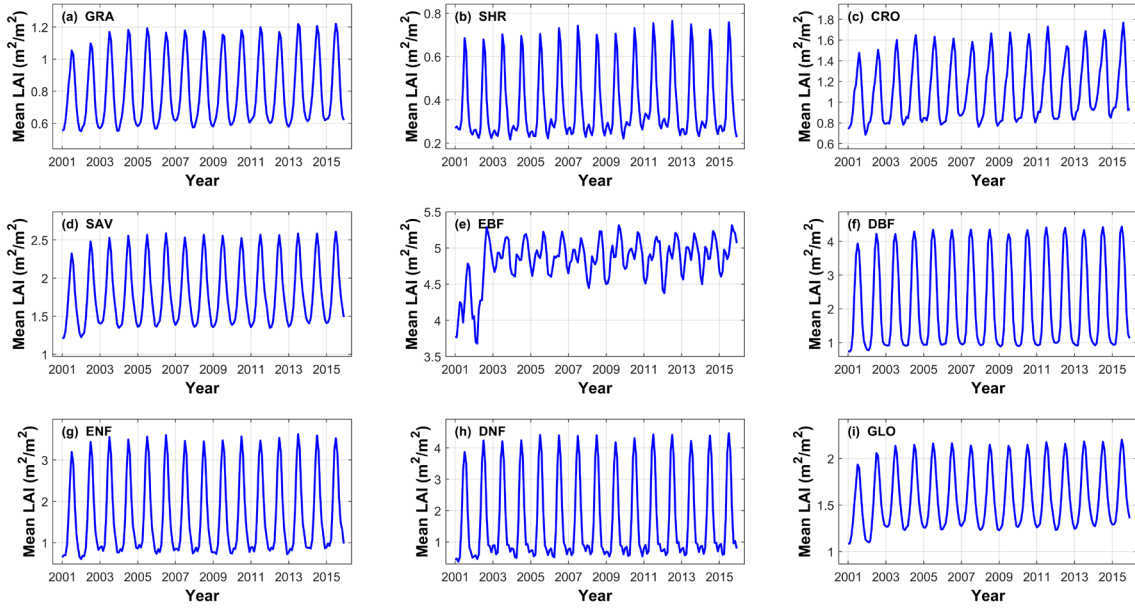

**Figure S2.** Annual LAI averages from the reprocessed MODIS LAI product (version 6) for different vegetation biome types. The vegetation biome types use the third classification scheme in the MODIS Land-Cover Type product (MCD12Q1, version 6.1) (see section 2.4). GLO represents the global vegetation biome. This figure demonstrates unexpected low LAI values for evergreen broadleaf forests (EBF) between 2000 and 2003.

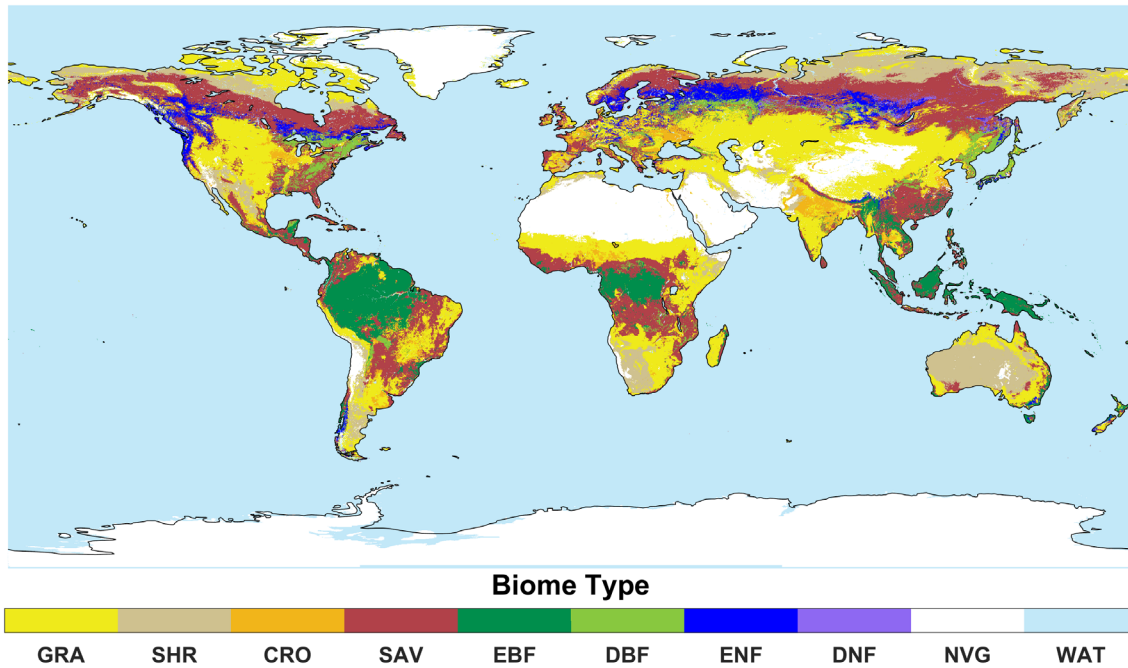

**Figure S3.** The global land cover map derived from the MODIS Land-Cover Type product (MCD12Q1, version 6.1). The third classification scheme in MCD12Q1 was adopted. Each grid ( $1/12^\circ$ ) in the map was labeled as the most frequent land cover type between 2001 and 2019.



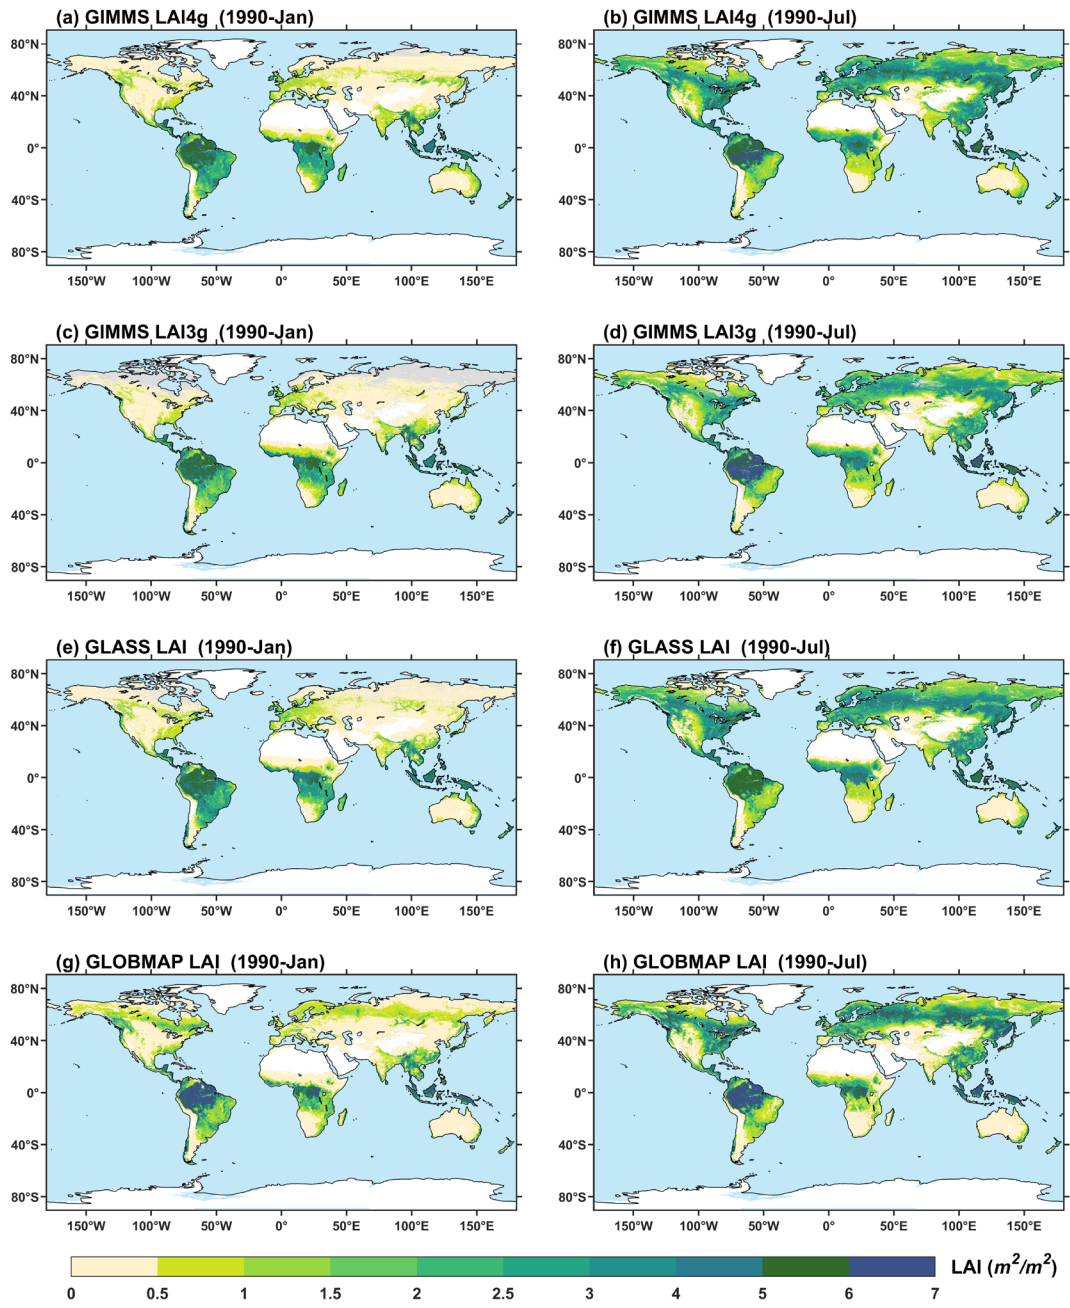

**Figure S4.** Illustrations of global distribution maps of GIMMS LAI4g after consolidation (a and b), GIMMS LAI3g (c and d), GLASS LAI (e and f), and GLOBMAP LAI (g and h) in January and July of 1990.

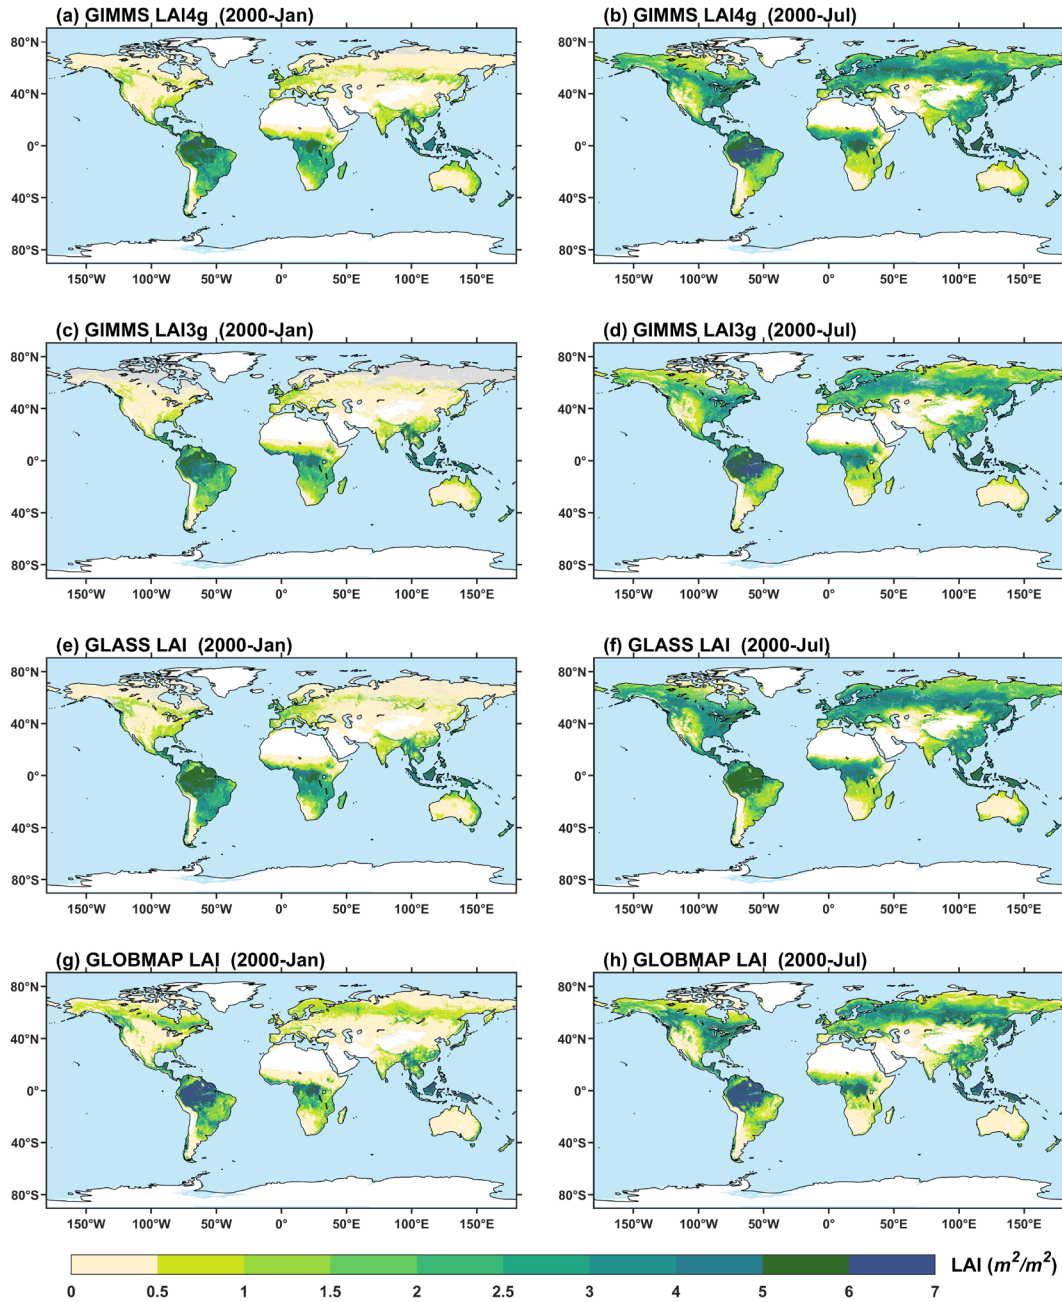

**Figure S5.** Illustrations of global distribution maps of GIMMS LAI4g after consolidation (a and b), GIMMS LAI3g (c and d), GLASS LAI (e and f), and GLOBMAP LAI (g and h) in January and July of 2000.

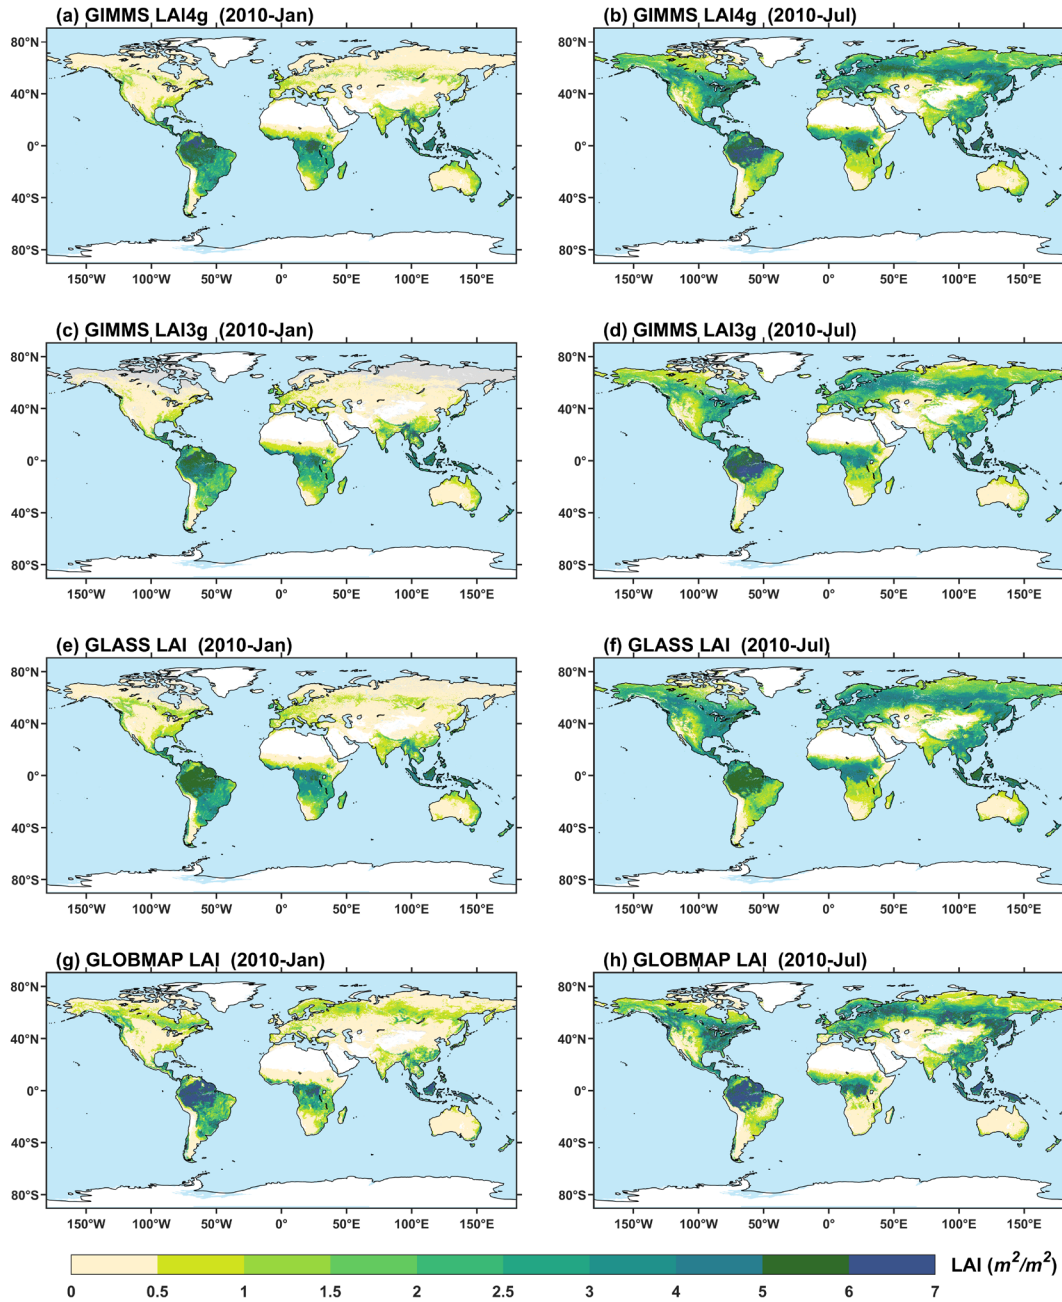

**Figure S6.** Illustrations of global distribution maps of GIMMS LAI4g after consolidation (a and b), GIMMS LAI3g (c and d), GLASS LAI (e and f), and GLOBMAP LAI (g and h) in January and July of 2010.

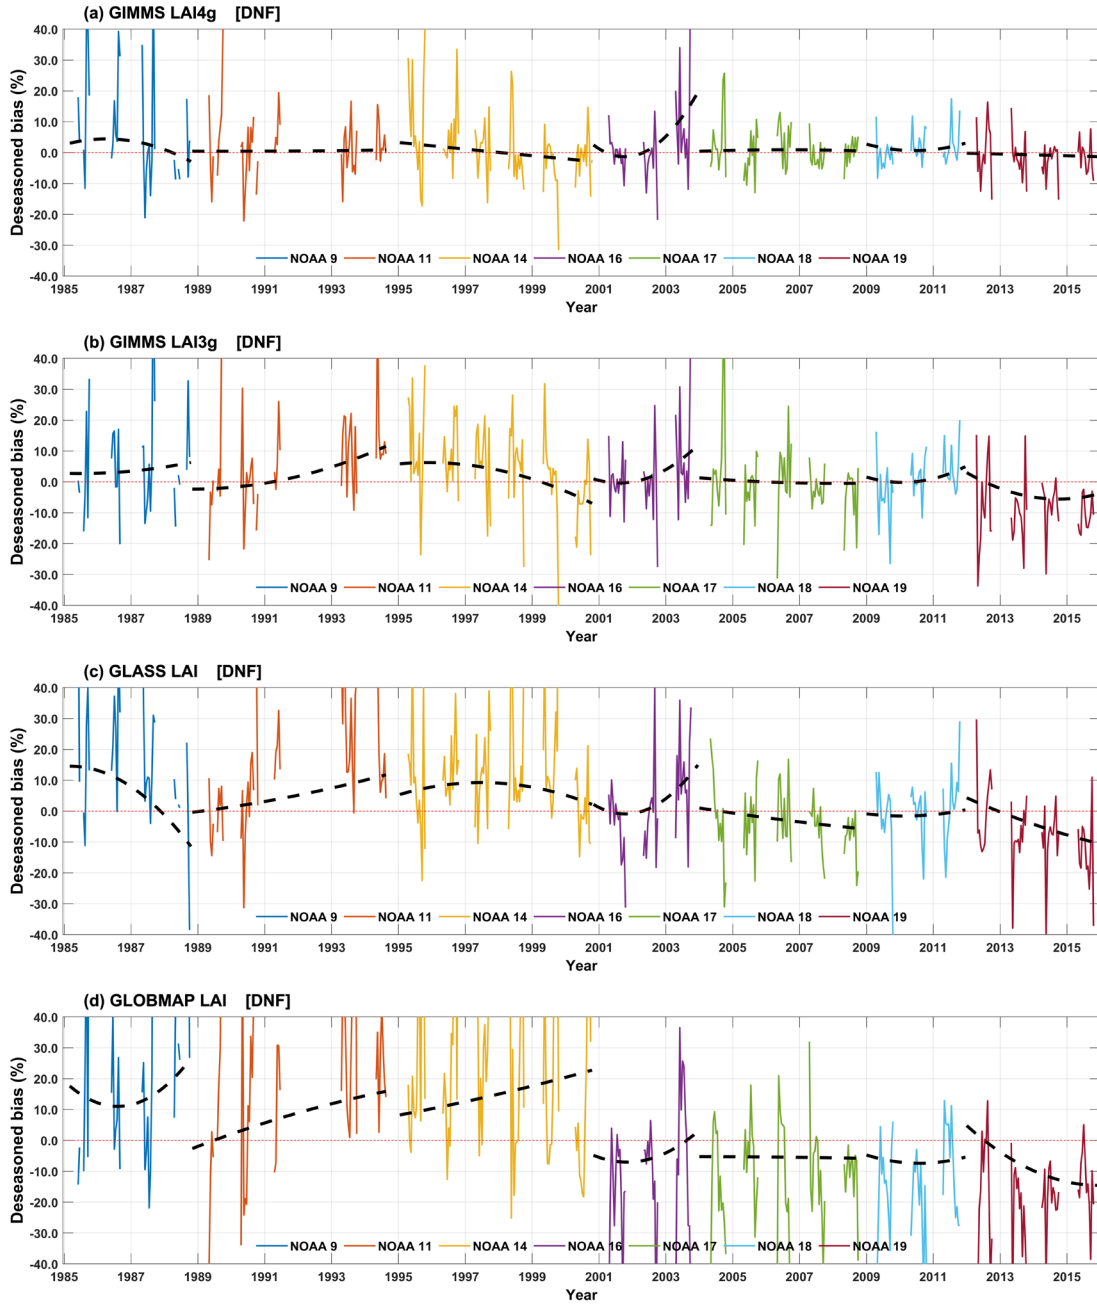

**Figure S7.** Temporal variations of LAI bias% in **DNF** for (a) the GIMMS LAI4g, (b) GIMMS LAI3g, (c) GLASS LAI, and (d) GLOBMAP LAI. The black dash line represents the interannual trend extracted by the EEMD method. Values from different NOAA satellite missions were distinguished with colors.

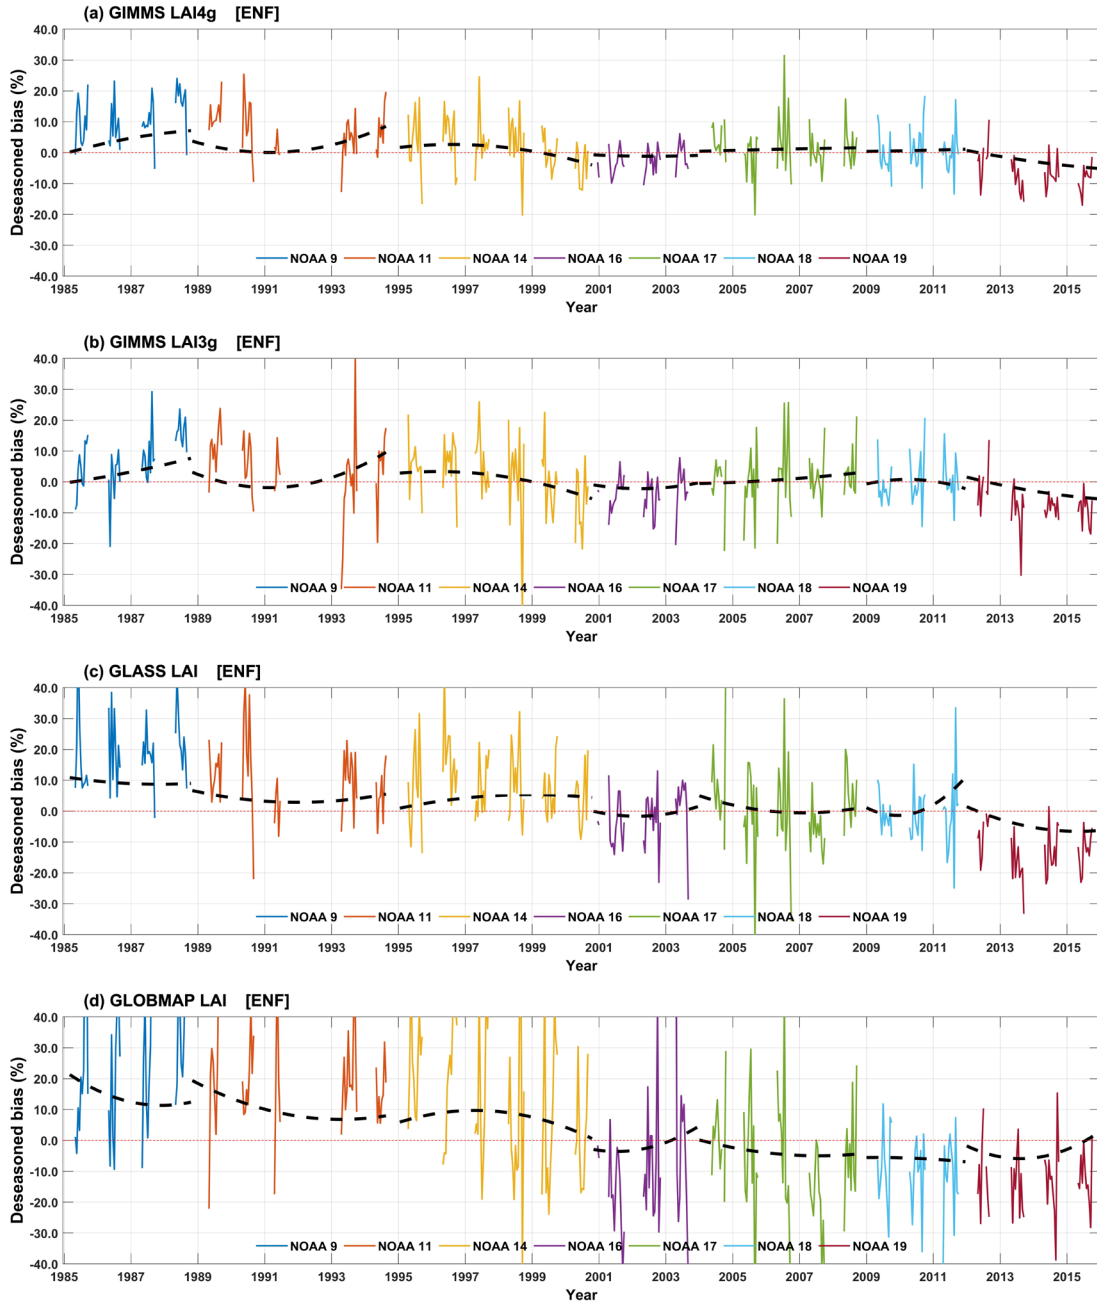

**Figure S8.** Temporal variations of LAI bias% in ENF for (a) the GIMMS LAI4g, (b) GIMMS LAI3g, (c) GLASS LAI, and (d) GLOBMAP LAI. The black dash line represents the interannual trend extracted by the EEMD method. Values from different NOAA satellite missions were distinguished with colors.



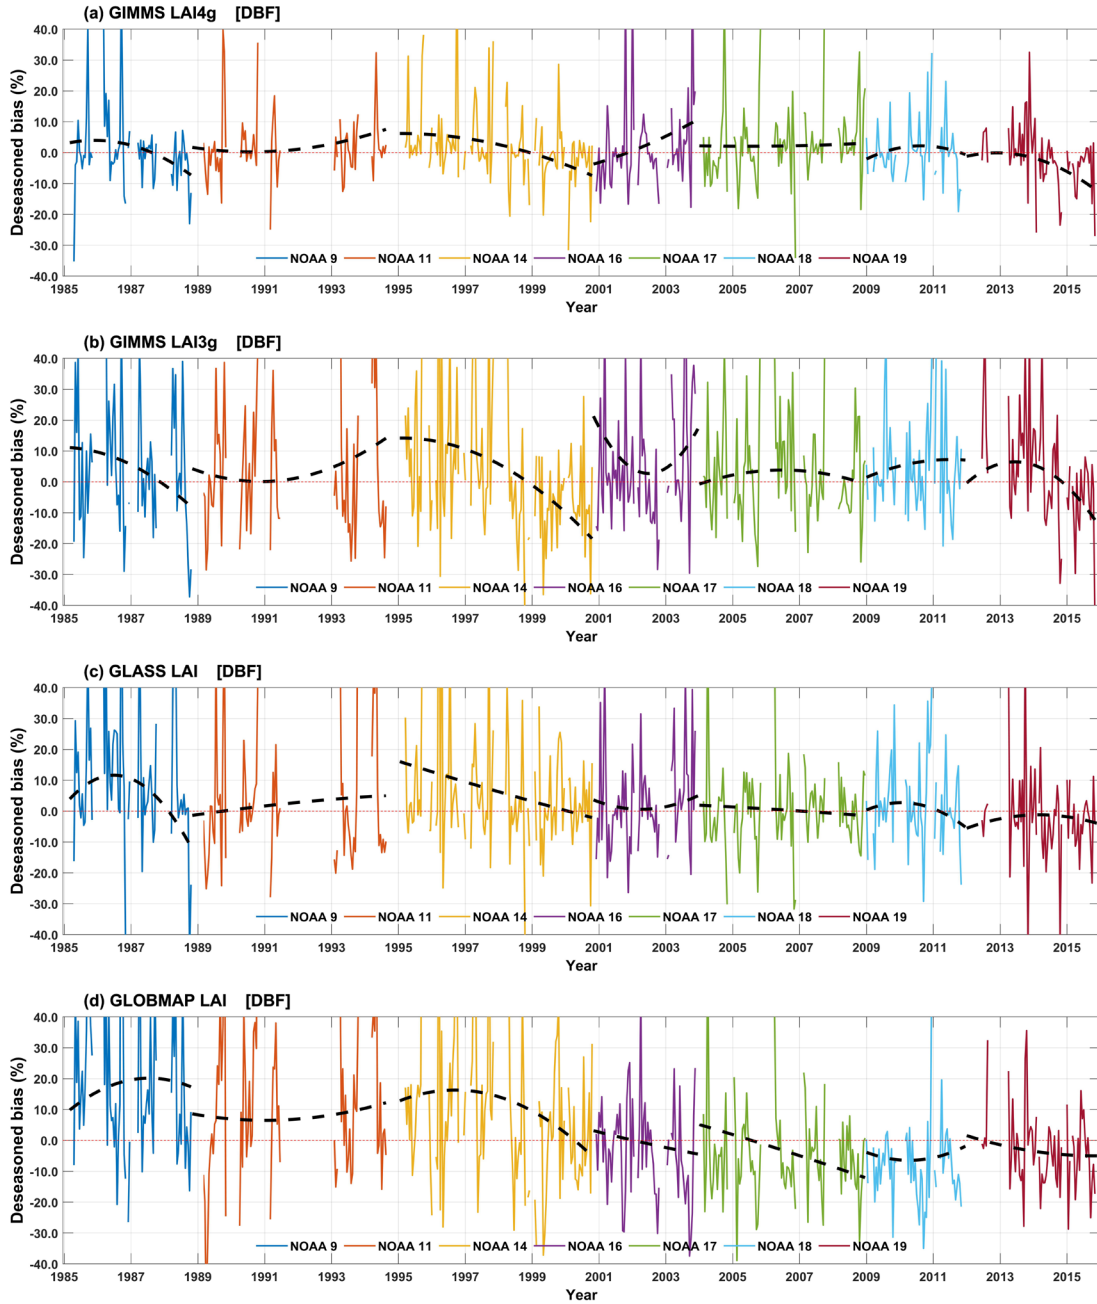

**Figure S9.** Temporal variations of LAI bias% in **DBF** for (a) the GIMMS LAI4g, (b) GIMMS LAI3g, (c) GLASS LAI, and (d) GLOBMAP LAI. The black dash line represents the interannual trend extracted by the EEMD method. Values from different NOAA satellite missions were distinguished with colors.

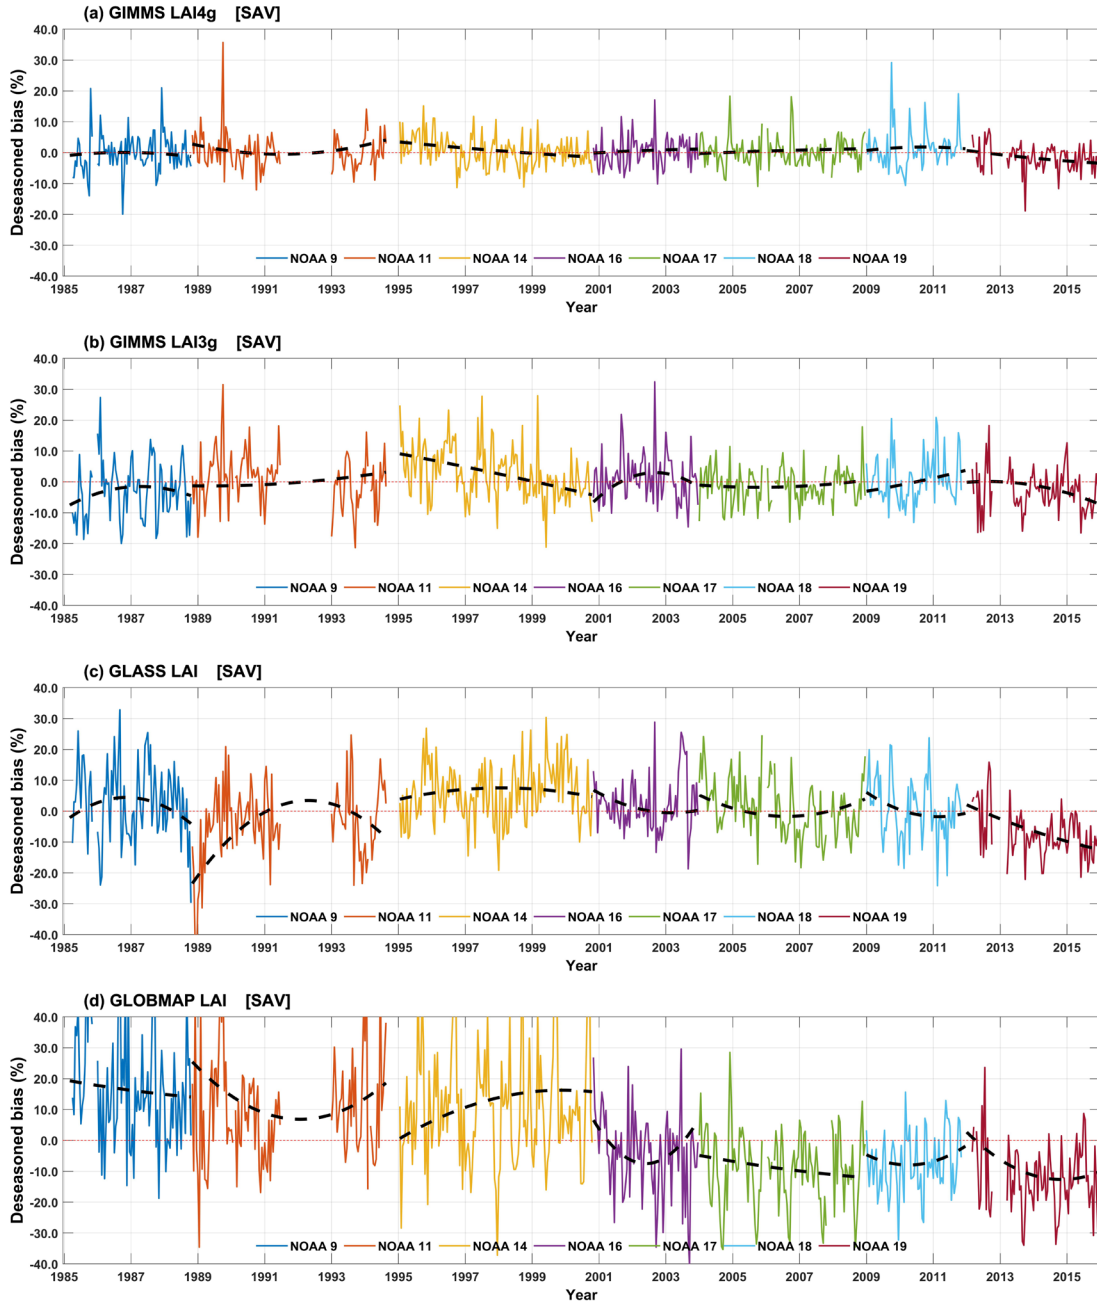

**Figure S10.** Temporal variations of LAI bias% in SAV for (a) the GIMMS LAI4g, (b) GIMMS LAI3g, (c) GLASS LAI, and (d) GLOBMAP LAI. The black dash line represents the interannual trend extracted by the EEMD method. Values from different NOAA satellite missions were distinguished with colors.

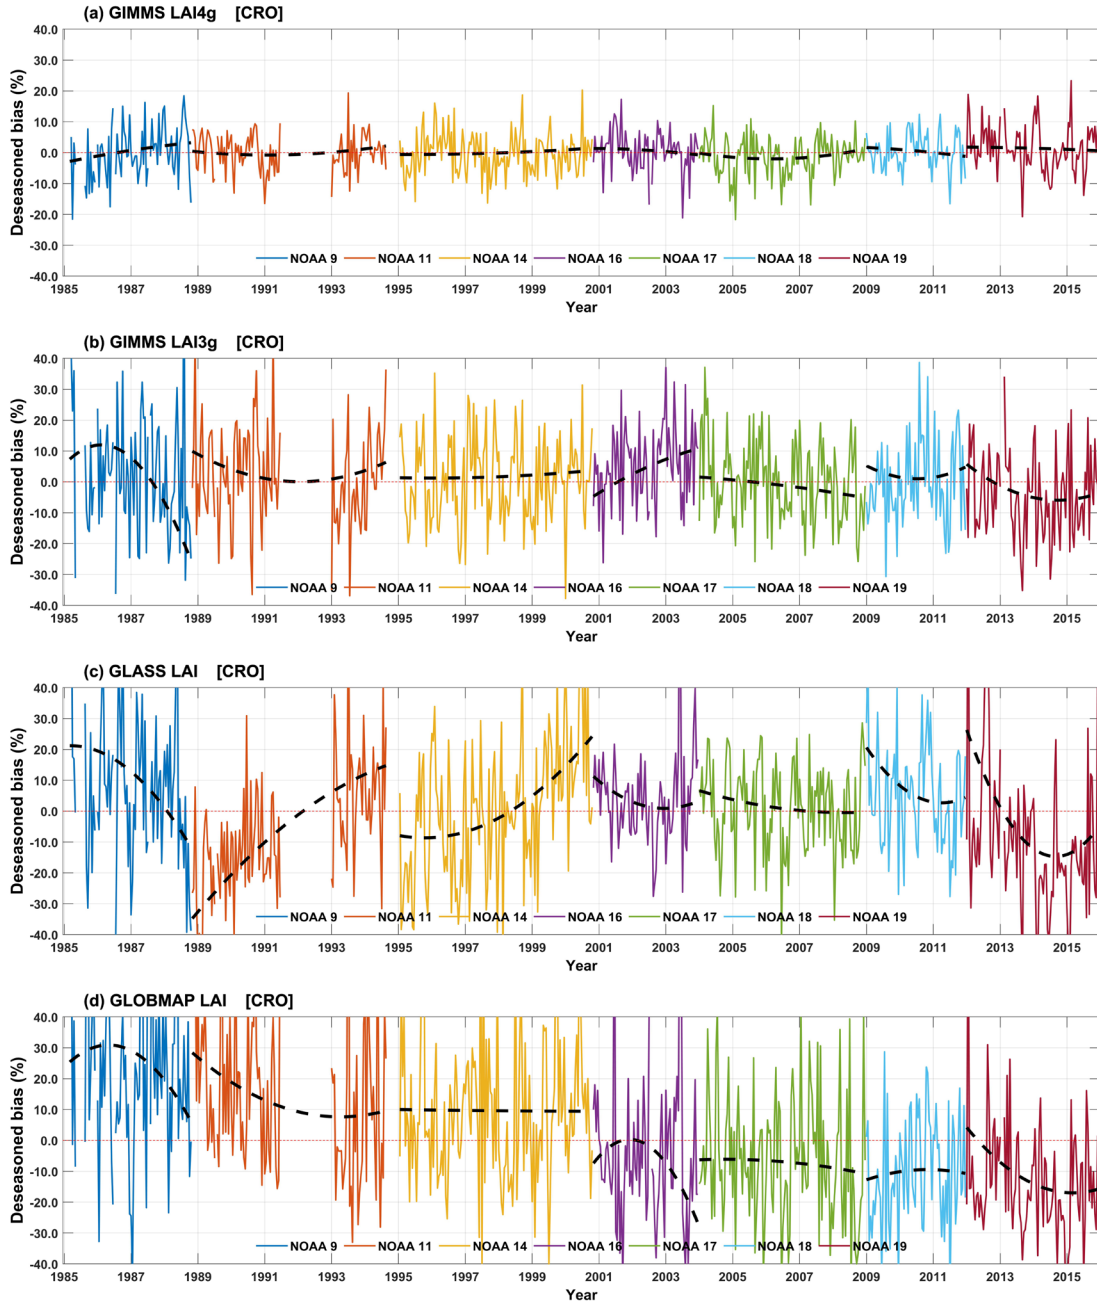

**Figure S11.** Temporal variations of LAI bias% in **CRO** for (a) the GIMMS LAI4g, (b) GIMMS LAI3g, (c) GLASS LAI, and (d) GLOBMAP LAI. The black dash line represents the interannual trend extracted by the EEMD method. Values from different NOAA satellite missions were distinguished with colors.



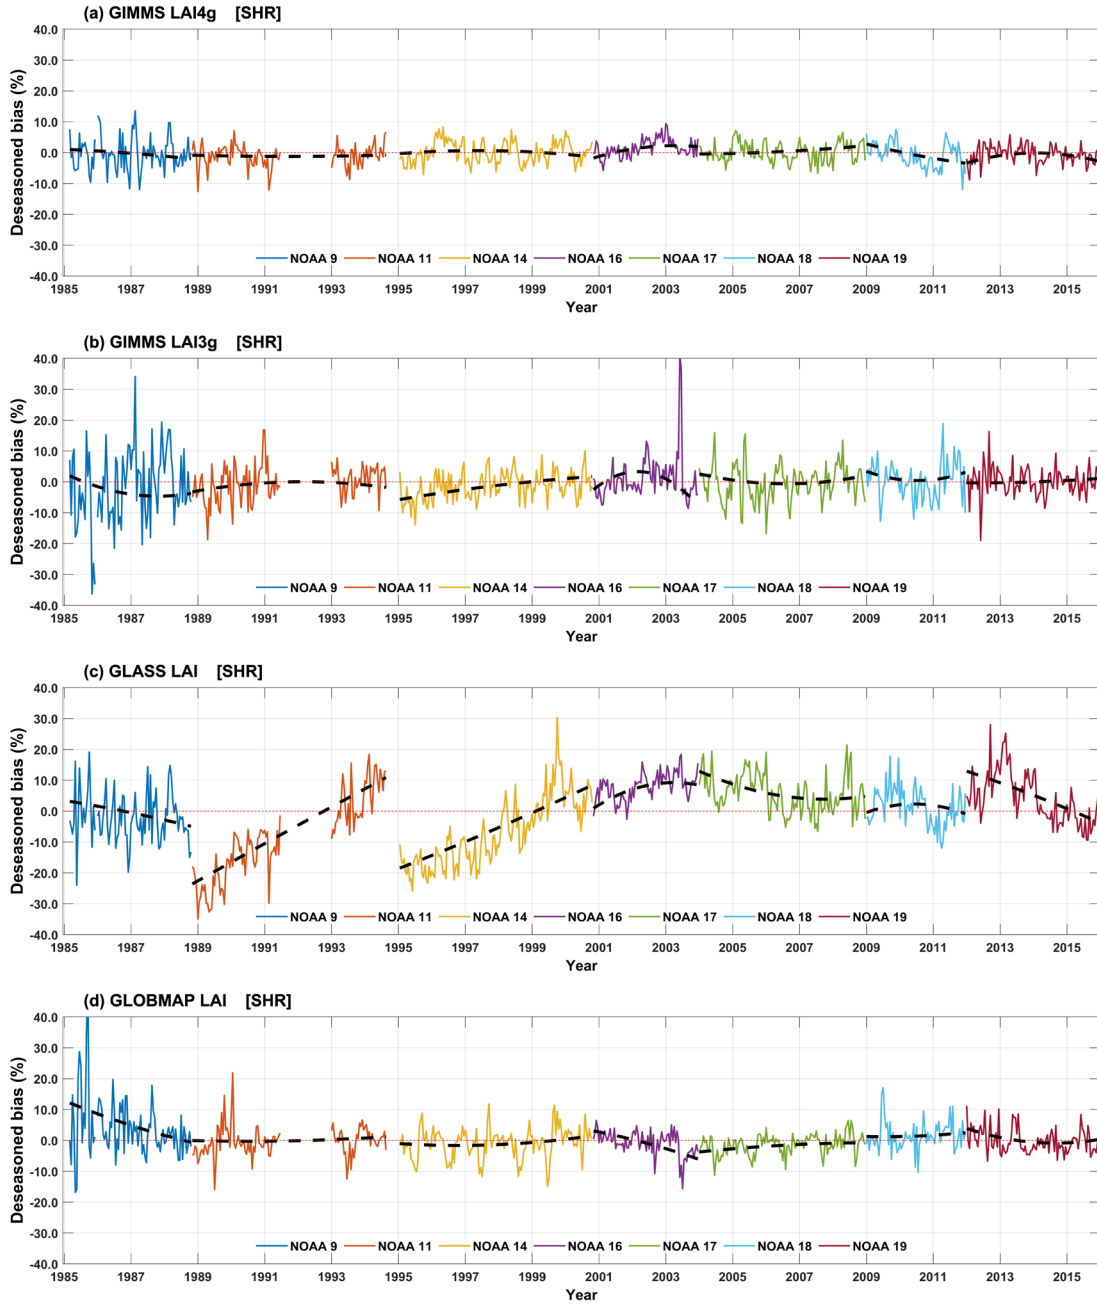

**Figure S12.** Temporal variations of LAI bias% in SHR for (a) the GIMMS LAI4g, (b) GIMMS LAI3g, (c) GLASS LAI, and (d) GLOBMAP LAI. The black dash line represents the interannual trend extracted by the EEMD method. Values from different NOAA satellite missions were distinguished with colors.

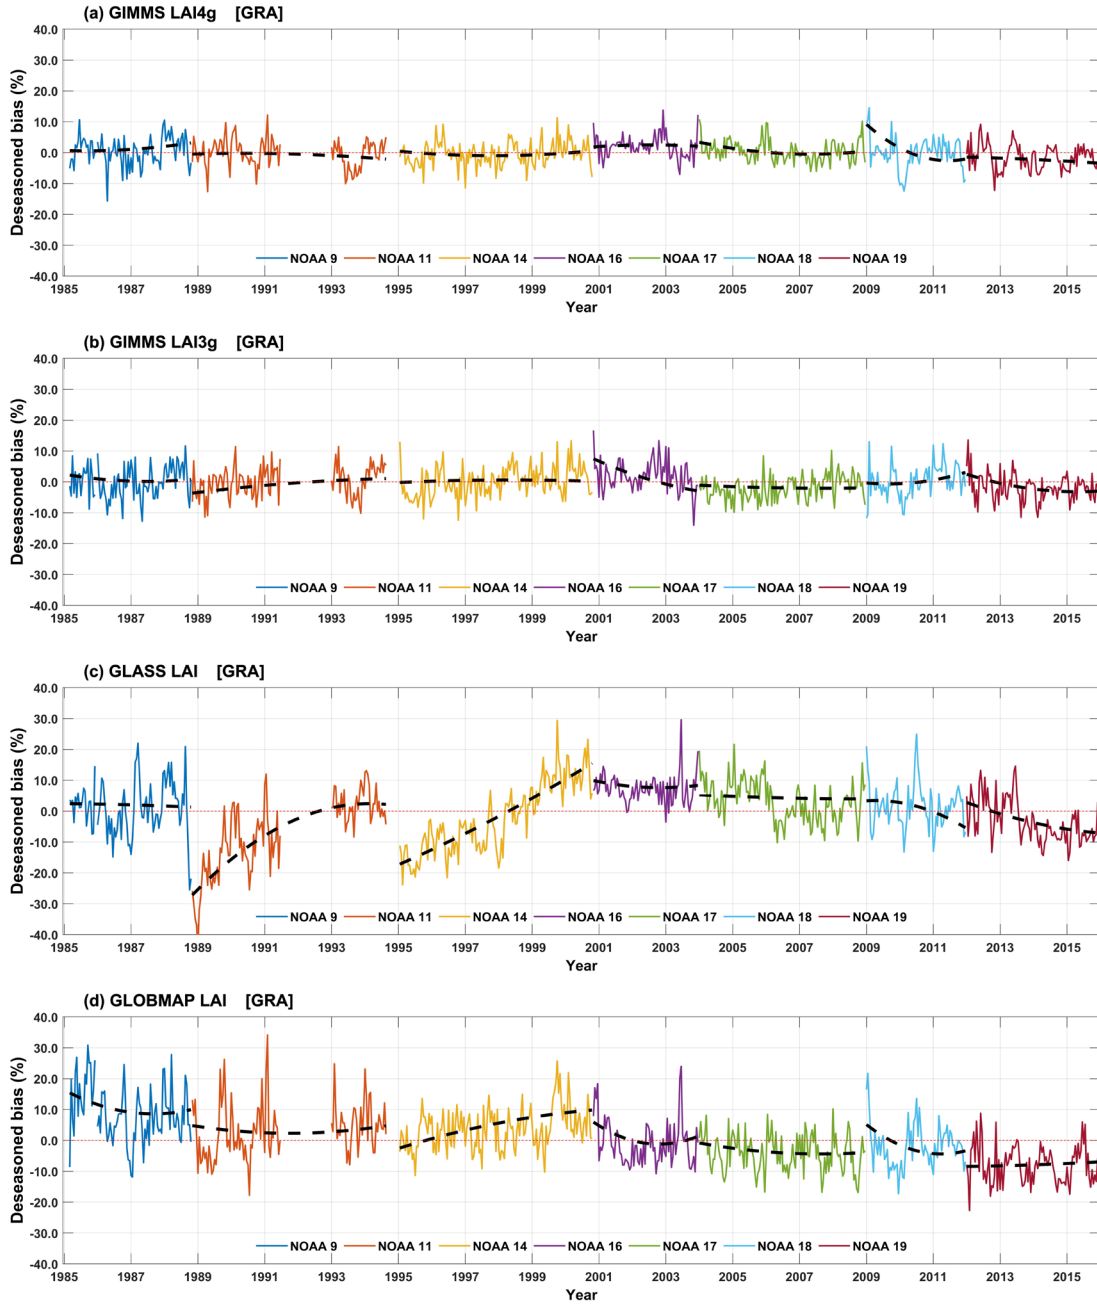

**Figure S13.** Temporal variations of LAI bias% in **GRA** for (a) the GIMMS LAI4g, (b) GIMMS LAI3g, (c) GLASS LAI, and (d) GLOBMAP LAI. The black dash line represents the interannual trend extracted by the EEMD method. Values from different NOAA satellite missions were distinguished with colors.

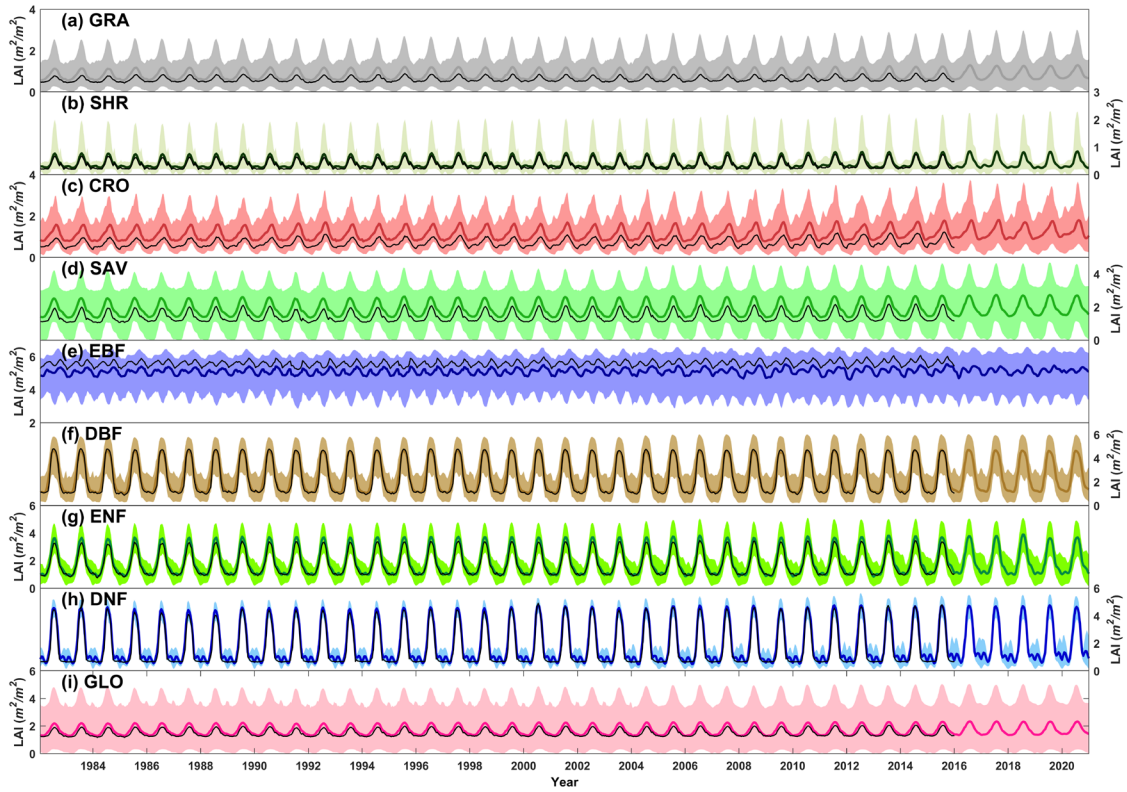

**Figure S14.** Temporal variations of the GIMMS LAI4g for different vegetation biome types during 1982–2020. GLO represents the global vegetation biome. The bold colored line represents the LAI average of GIMMSLAI4g after data consolidation, with shadow covering the value range between 10% and 90% quantiles. The thin black line represents the LAI average of GIMMSLAI4g before consolidation. It should be noted that the GIMMS LAI4g after consolidation shared the same footprint with the reprocessed MODIS LAI after the year 2004.

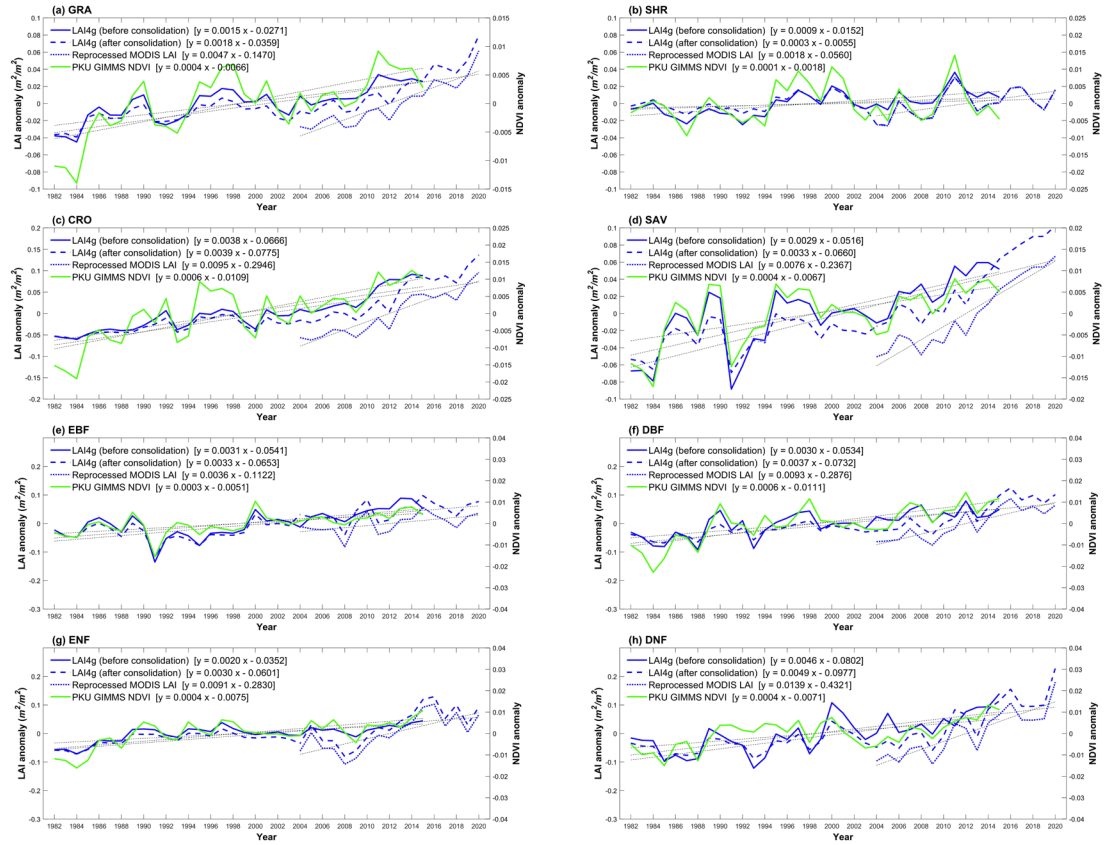

**Figure S15.** Annual anomalies ( $m^2m^{-2}$ ) and trends of GIMMS LAI4g before consolidation (1982–2015), GIMMS LAI4g after consolidation (1982–2020), reprocessed MODIS LAI (2004–2020), and PKU GIMMS NDVI (1982–2015) for different vegetation biome types.

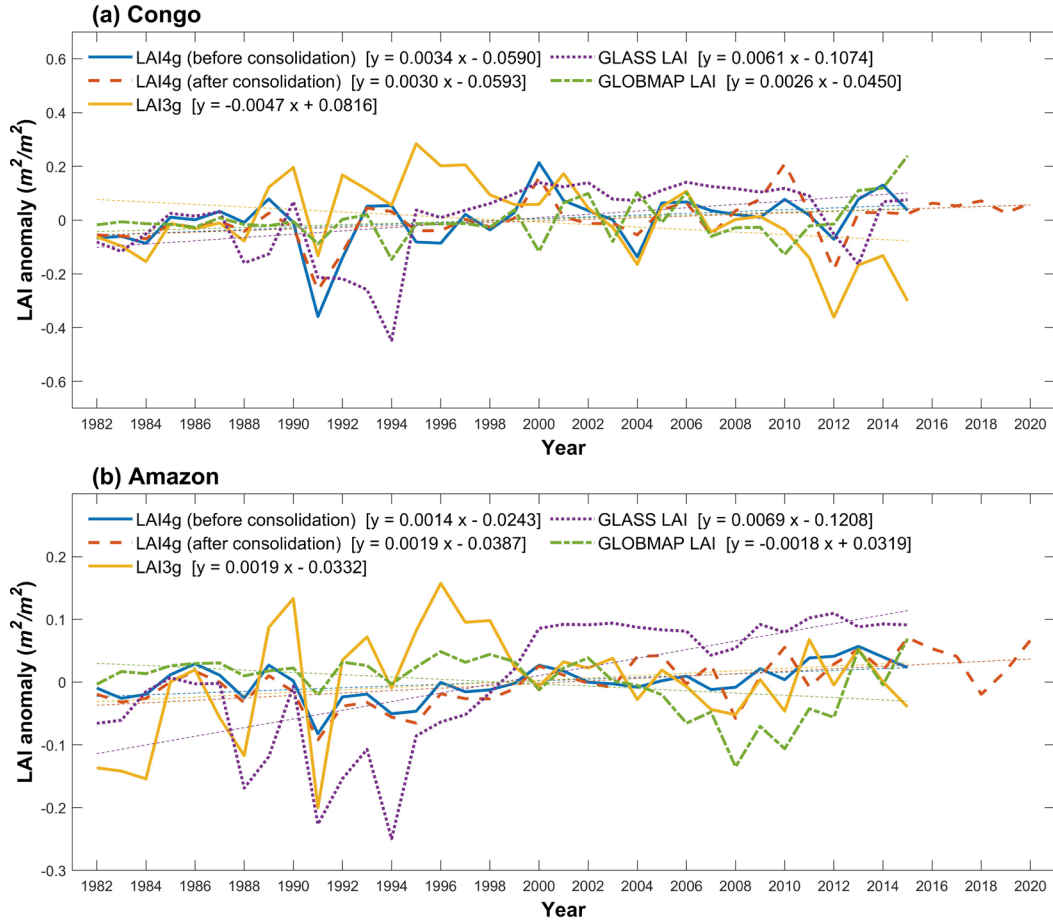

**Figure S16.** Annual anomalies ( $m^2m^{-2}$ ) and trends of GIMMS LAI4g before consolidation (1982–2015), GIMMS LAI4g after consolidation (1982–2020), GIMMS LAI3g (1982–2015), GLASS LAI (1982–2015), and GLOBMAP LAI (1982–2015) in the Congo (a) and Amazon (b) forests.

**Table S1.** Information of field LAI ( $m^2m^{-2}$ ) measurements used for validation. A total of 113 measurements from 49 distinct sites were available. In the “Source” column, B stands for BELMANIP V2.1, D for DIRECT V2.1, O for ORNL, and B & D indicates that the measurements can be found both in BELMANIP V2.1 and DIRECT V2.1.

| Site_name           | Biome    | Latitude | Longitude | Source | Year | Month | Day | LAI   |
|---------------------|----------|----------|-----------|--------|------|-------|-----|-------|
| <b>Camerons</b>     | EBF      | -32.60   | 116.25    | B      | 2004 | 3     | 3   | 2.084 |
| <b>AGRO</b>         | Crops    | 40.01    | -88.29    | B & D  | 2000 | 7     | 4   | 2.56  |
| <b>AGRO</b>         | Crops    | 40.01    | -88.29    | B & D  | 2000 | 8     | 11  | 3.543 |
| <b>KONZ</b>         | Herb.    | 39.09    | -96.57    | B & D  | 2000 | 6     | 7   | 2.175 |
| <b>KONZ</b>         | Herb.    | 39.09    | -96.57    | B & D  | 2001 | 8     | 16  | 2.907 |
| <b>SEVI</b>         | Shrubs   | 34.35    | -106.69   | B & D  | 2002 | 9     | 9   | 0.402 |
| <b>SEVI</b>         | Shrubs   | 34.35    | -106.69   | B & D  | 2002 | 11    | 15  | 0.323 |
| <b>SEVI</b>         | Shrubs   | 34.35    | -106.69   | B & D  | 2003 | 6     | 23  | 0.061 |
| <b>SEVI</b>         | Shrubs   | 34.35    | -106.69   | B & D  | 2003 | 7     | 28  | 0.047 |
| <b>SEVI</b>         | Shrubs   | 34.35    | -106.69   | B & D  | 2003 | 9     | 15  | 0.05  |
| <b>SEVI</b>         | Shrubs   | 34.35    | -106.69   | B & D  | 2003 | 11    | 21  | 0.103 |
| <b>Larose2</b>      | Mixed F. | 45.38    | -75.17    | B & D  | 2003 | 8     | 15  | 2.868 |
| <b>Barrax</b>       | Crops    | 39.07    | -2.10     | B & D  | 2005 | 7     | 13  | 0.37  |
| <b>Barrax</b>       | Crops    | 39.07    | -2.10     | B & D  | 2009 | 6     | 22  | 0.968 |
| <b>Barrax</b>       | Crops    | 39.07    | -2.10     | B & D  | 2010 | 6     | 16  | 0.5   |
| <b>Counami</b>      | EBF      | 5.35     | -53.24    | B & D  | 2001 | 9     | 26  | 4.929 |
| <b>Counami</b>      | EBF      | 5.34     | -53.24    | B & D  | 2002 | 10    | 13  | 4.373 |
| <b>Fundulea</b>     | Crops    | 44.41    | 26.58     | B & D  | 2001 | 5     | 8   | 3.04  |
| <b>Fundulea</b>     | Crops    | 44.41    | 26.58     | B & D  | 2002 | 5     | 24  | 1.476 |
| <b>Gnangara</b>     | EBF      | -31.53   | 115.88    | B & D  | 2004 | 3     | 1   | 1.007 |
| <b>Larose</b>       | Mixed F. | 45.38    | -75.22    | B & D  | 2003 | 8     | 7   | 5.858 |
| <b>Nezer</b>        | NLF      | 44.57    | -1.04     | B & D  | 2002 | 4     | 17  | 2.547 |
| <b>Plan_De_Dieu</b> | Crops    | 44.20    | 4.95      | B & D  | 2004 | 7     | 7   | 1.133 |
| <b>Turco</b>        | Shrubs   | -18.24   | -68.18    | B & D  | 2001 | 7     | 27  | 0.03  |
| <b>Wankama</b>      | Herb.    | 13.65    | 2.64      | B & D  | 2005 | 6     | 23  | 0.014 |
| <b>Zhang_Bei</b>    | Herb.    | 41.28    | 114.69    | B & D  | 2002 | 8     | 9   | 1.263 |
| <b>Pandamatenga</b> | DBF      | -18.65   | 25.50     | B & D  | 2000 | 3     | 4   | 1.579 |
| <b>Maun</b>         | Shrubs   | -19.92   | 23.59     | B & D  | 2000 | 3     | 8   | 1.24  |
| <b>Mongu</b>        | Shrubs   | -15.44   | 23.25     | B & D  | 1999 | 8     | 18  | 0.67  |
| <b>Mongu</b>        | Shrubs   | -15.44   | 23.25     | B & D  | 2000 | 2     | 29  | 2.34  |
| <b>Mongu</b>        | Shrubs   | -15.44   | 23.25     | B & D  | 2000 | 4     | 19  | 2.25  |
| <b>Mongu</b>        | Shrubs   | -15.44   | 23.25     | B & D  | 2000 | 5     | 17  | 1.84  |
| <b>Mongu</b>        | Shrubs   | -15.44   | 23.25     | B & D  | 2000 | 6     | 14  | 1.54  |
| <b>Mongu</b>        | Shrubs   | -15.44   | 23.25     | B & D  | 2000 | 9     | 1   | 1.12  |
| <b>Mongu</b>        | Shrubs   | -15.44   | 23.25     | B & D  | 2000 | 9     | 27  | 1.142 |
| <b>Mongu</b>        | Shrubs   | -15.44   | 23.25     | B & D  | 2000 | 10    | 17  | 1.22  |
| <b>Mongu</b>        | Shrubs   | -15.44   | 23.25     | B & D  | 2000 | 11    | 6   | 1.38  |

|                          |        |        |        |       |      |    |    |       |
|--------------------------|--------|--------|--------|-------|------|----|----|-------|
| <b>Mongu</b>             | Shrubs | -15.44 | 23.25  | B & D | 2000 | 11 | 20 | 1.66  |
| <b>Mongu</b>             | Shrubs | -15.44 | 23.25  | B & D | 2000 | 12 | 19 | 1.95  |
| <b>Harth Forest</b>      | DBF    | 47.81  | 7.45   | B & D | 2013 | 9  | 4  | 3.795 |
| <b>SouthWest_1</b>       | Crops  | 43.55  | 1.09   | B & D | 2013 | 7  | 10 | 1.01  |
| <b>SouthWest_1</b>       | Crops  | 43.55  | 1.09   | B & D | 2013 | 7  | 26 | 1.19  |
| <b>SouthWest_1</b>       | Crops  | 43.55  | 1.09   | B & D | 2013 | 8  | 18 | 1.7   |
| <b>25de Mayo_Alfalfa</b> | Crops  | -37.91 | -67.75 | B & D | 2014 | 2  | 9  | 1.3   |
| <b>Barrax-LasTias</b>    | Crops  | 39.05  | -2.10  | B & D | 2015 | 5  | 27 | 1.01  |
| <b>SanFernando</b>       | Crops  | -34.72 | -71.00 | B & D | 2015 | 1  | 19 | 1.96  |
| <b>Honghe_B</b>          | Rice   | 47.66  | 133.53 | D     | 2012 | 6  | 19 | 0.578 |
| <b>Honghe_B</b>          | Rice   | 47.66  | 133.53 | D     | 2012 | 6  | 24 | 1.720 |
| <b>Honghe_B</b>          | Rice   | 47.66  | 133.53 | D     | 2012 | 6  | 29 | 2.888 |
| <b>Honghe_B</b>          | Rice   | 47.66  | 133.53 | D     | 2012 | 7  | 25 | 5.183 |
| <b>Honghe_B</b>          | Rice   | 47.66  | 133.53 | D     | 2012 | 8  | 13 | 3.293 |
| <b>Honghe_B</b>          | Rice   | 47.66  | 133.53 | D     | 2012 | 8  | 30 | 3.405 |
| <b>Honghe_B</b>          | Rice   | 47.66  | 133.53 | D     | 2012 | 9  | 16 | 2.929 |
| <b>Honghe_B</b>          | Rice   | 47.66  | 133.53 | D     | 2013 | 8  | 27 | 4.672 |
| <b>Honghe_C</b>          | Rice   | 47.65  | 133.52 | D     | 2012 | 6  | 19 | 0.615 |
| <b>Honghe_C</b>          | Rice   | 47.65  | 133.52 | D     | 2012 | 6  | 24 | 1.778 |
| <b>Honghe_C</b>          | Rice   | 47.65  | 133.52 | D     | 2012 | 6  | 29 | 2.850 |
| <b>Honghe_C</b>          | Rice   | 47.65  | 133.52 | D     | 2012 | 7  | 25 | 5.110 |
| <b>Honghe_C</b>          | Rice   | 47.65  | 133.52 | D     | 2012 | 8  | 13 | 3.100 |
| <b>Honghe_C</b>          | Rice   | 47.65  | 133.52 | D     | 2012 | 8  | 30 | 3.395 |
| <b>Honghe_C</b>          | Rice   | 47.65  | 133.52 | D     | 2012 | 9  | 16 | 3.037 |
| <b>Honghe_C</b>          | Rice   | 47.65  | 133.52 | D     | 2013 | 8  | 27 | 4.636 |
| <b>Honghe_D</b>          | Rice   | 47.64  | 133.52 | D     | 2012 | 6  | 19 | 0.675 |
| <b>Honghe_D</b>          | Rice   | 47.64  | 133.52 | D     | 2012 | 6  | 24 | 1.883 |
| <b>Honghe_D</b>          | Rice   | 47.64  | 133.52 | D     | 2012 | 6  | 29 | 3.064 |
| <b>Honghe_D</b>          | Rice   | 47.64  | 133.52 | D     | 2012 | 7  | 25 | 5.094 |
| <b>Honghe_D</b>          | Rice   | 47.64  | 133.52 | D     | 2012 | 8  | 13 | 3.103 |
| <b>Honghe_D</b>          | Rice   | 47.64  | 133.52 | D     | 2012 | 8  | 30 | 3.430 |
| <b>Honghe_D</b>          | Rice   | 47.64  | 133.52 | D     | 2012 | 9  | 16 | 3.141 |
| <b>Honghe_D</b>          | Rice   | 47.64  | 133.52 | D     | 2013 | 8  | 27 | 4.627 |
| <b>Honghe_E</b>          | Rice   | 47.64  | 133.53 | D     | 2012 | 6  | 19 | 0.672 |
| <b>Honghe_E</b>          | Rice   | 47.64  | 133.53 | D     | 2012 | 6  | 24 | 1.864 |
| <b>Honghe_E</b>          | Rice   | 47.64  | 133.53 | D     | 2012 | 6  | 29 | 2.723 |
| <b>Honghe_E</b>          | Rice   | 47.64  | 133.53 | D     | 2012 | 7  | 25 | 5.036 |
| <b>Honghe_E</b>          | Rice   | 47.64  | 133.53 | D     | 2012 | 8  | 13 | 2.842 |
| <b>Honghe_E</b>          | Rice   | 47.64  | 133.53 | D     | 2012 | 8  | 30 | 3.334 |
| <b>Honghe_E</b>          | Rice   | 47.64  | 133.53 | D     | 2012 | 9  | 16 | 2.796 |
| <b>Honghe_E</b>          | Rice   | 47.64  | 133.53 | D     | 2013 | 8  | 27 | 4.484 |
| <b>HLJ_barley_1</b>      | Crops  | 46.80  | 131.81 | D     | 2007 | 6  | 14 | 1.135 |
| <b>HLJ_barley_2</b>      | Crops  | 46.80  | 131.90 | D     | 2007 | 6  | 14 | 1.338 |

|                                 |                |        |        |   |      |    |    |       |
|---------------------------------|----------------|--------|--------|---|------|----|----|-------|
| <b>HLJ_barley_3</b>             | Crops          | 46.79  | 131.89 | D | 2005 | 5  | 23 | 0.763 |
| <b>HLJ_barley_3</b>             | Crops          | 46.79  | 131.89 | D | 2006 | 6  | 2  | 0.702 |
| <b>HLJ_barley_3</b>             | Crops          | 46.79  | 131.89 | D | 2007 | 6  | 14 | 1.202 |
| <b>HLJ_barley_4</b>             | Crops          | 46.79  | 131.98 | D | 2005 | 5  | 23 | 0.466 |
| <b>HLJ_barley_4</b>             | Crops          | 46.79  | 131.98 | D | 2006 | 6  | 2  | 0.812 |
| <b>HLJ_barley_8</b>             | Crops          | 46.74  | 131.76 | D | 2006 | 6  | 2  | 0.812 |
| <b>HLJ_barley_13</b>            | Crops          | 46.71  | 131.72 | D | 2006 | 6  | 2  | 0.654 |
| <b>HLJ_barley_14</b>            | Crops          | 46.75  | 131.84 | D | 2005 | 5  | 23 | 0.375 |
| <b>HLJ_barley_16</b>            | Crops          | 46.73  | 131.90 | D | 2007 | 6  | 14 | 1.312 |
| <b>HLJ_barley_19</b>            | Crops          | 46.70  | 131.87 | D | 2005 | 5  | 23 | 0.293 |
| <b>HLJ_wheat_1</b>              | Crops          | 46.97  | 131.97 | D | 2006 | 6  | 2  | 0.521 |
| <b>HLJ_wheat_2</b>              | Crops          | 46.96  | 131.99 | D | 2006 | 6  | 2  | 0.569 |
| <b>HLJ_wheat_3</b>              | Crops          | 46.94  | 131.97 | D | 2006 | 6  | 2  | 0.565 |
| <b>HLJ_wheat_6</b>              | Crops          | 46.90  | 131.98 | D | 2006 | 6  | 2  | 0.483 |
| <b>HLJ_wheat_8</b>              | Crops          | 46.79  | 131.91 | D | 2005 | 5  | 23 | 0.709 |
| <b>HLJ_wheat_14</b>             | Crops          | 46.76  | 131.74 | D | 2005 | 5  | 23 | 0.505 |
| <b>HLJ_wheat_15</b>             | Crops          | 46.76  | 131.85 | D | 2005 | 5  | 23 | 0.438 |
| <b>HLJ_wheat_16</b>             | Crops          | 46.74  | 131.71 | D | 2005 | 5  | 23 | 0.492 |
| <b>Jadraas, plot C15</b>        | Forest / BoENL | 60.82  | 16.50  | O | 1990 | 8  | \  | 1.32  |
| <b>N/A</b>                      | Forest / BoDBL | 56.42  | -98.07 | O | 1994 | 7  | \  | 2.2   |
| <b>BOREAS NSA, Thompson</b>     | Forest / BoENL | 55.92  | -97.69 | O | 1994 | 7  | \  | 0.95  |
| <b>BOREAS NSA, Thompson</b>     | Forest / BoENL | 55.89  | -99.03 | O | 1994 | 7  | \  | 1.24  |
| <b>Tienhoven</b>                | Grassland      | 52.17  | 5.08   | O | 1987 | 5  | 6  | 1.02  |
| <b>Tienhoven</b>                | Grassland      | 52.17  | 5.08   | O | 1987 | 7  | 23 | 2.69  |
| <b>Tienhoven</b>                | Grassland      | 52.17  | 5.08   | O | 1987 | 6  | 11 | 2.06  |
| <b>Kioloa State Forest, NSW</b> | Forest / TeEBL | -35.35 | 150.18 | O | 1988 | 2  | 25 | 3.46  |
| <b>Kioloa State Forest, NSW</b> | Forest / TeEBL | -35.35 | 150.18 | O | 1986 | 10 | 1  | 3.97  |
| <b>Kioloa State Forest, NSW</b> | Forest / TeEBL | -35.35 | 150.18 | O | 1986 | 2  | 19 | 4.95  |
| <b>Kioloa State Forest, NSW</b> | Forest / TeEBL | -35.35 | 150.18 | O | 1985 | 6  | 24 | 3.4   |
| <b>Kioloa State Forest, NSW</b> | Forest / TeEBL | -35.35 | 150.18 | O | 1985 | 8  | 11 | 3.44  |
| <b>Kioloa State Forest, NSW</b> | Forest / TeEBL | -35.35 | 150.18 | O | 1984 | 7  | 7  | 3.94  |
| <b>Kioloa State Forest, NSW</b> | Forest / TeEBL | -35.35 | 150.18 | O | 1983 | 7  | 13 | 2.22  |
| <b>Kioloa State Forest, NSW</b> | Forest / TeEBL | -35.35 | 150.18 | O | 1982 | 12 | 12 | 3.25  |
